# Supplementary material for: NFKB1-94insertion/deletion ATTG polymorphism and cancer risk: Evidence from 50 case-control studies
Source: Oncotarget. 2016 Dec 26;8(6):9806–22. doi: 10.18632/oncotarget.14190 (PMC5354772; doi:10.18632/oncotarget.14190)
Supplement: Supplementary file 1 [file oncotarget-08-9806-s001.pdf]

## ***NFKB1* -94insertion/deletion ATTG polymorphism and cancer risk: Evidence from 50 case-control studies**

### **SUPPLEMENTARY TABLES**

**Supplementary Table 1: Quality assessment scoring for the included studies.**

| <b>Criteria</b>                                   | <b>Score</b> |
|---------------------------------------------------|--------------|
| Representativeness of cases                       |              |
| Selected from population cancer registry          | 2            |
| Selected from hospital                            | 1            |
| No method of selection described                  | 0            |
| Representativeness of controls                    |              |
| Population-based                                  | 3            |
| Blood donors                                      | 2            |
| Hospital-based                                    | 1            |
| Not described                                     | 0            |
| Ascertainment of cancer cases                     |              |
| Histopathologic confirmation                      | 2            |
| Patient medical record                            | 1            |
| Not described                                     | 0            |
| Control selection                                 |              |
| Controls matched with cases by age and sex        | 2            |
| Controls matched with cases only by age or by sex | 1            |
| Not matched or not described                      | 0            |
| Genotyping examination                            |              |
| Genotyping done blindly and quality control       | 2            |
| Only genotyping done blindly or quality control   | 1            |
| Unblinded and without quality control             | 0            |
| Total sample size for both cases and controls     |              |
| Larger than 1000                                  | 3            |
| Larger than 500, but less than 1000               | 2            |
| Larger than 200, but less than 500                | 1            |
| Less than 200                                     | 0            |
